# Supplementary material for: Aging and calorie restriction regulate the expression of miR-125a-5p and its target genes Stat3, Casp2 and Stard13
Source: publisher site journal article supplement (doi:10.18632/aging.101270), 2017-07-31
Supplement: Supplementary file 1 [file aging-v9i7-101270-supplementary-material-SD1.pdf]

**SUPPLEMENTARY MATERIAL**

**Supplementary Table S1. The effect of 30% CR on miRNA expression in the liver.**

|                 | Group 1 |       | Group 2 |        |                 |
|-----------------|---------|-------|---------|--------|-----------------|
|                 | Cr      |       | Ad      |        |                 |
| Reporter Name   | Mean    | StDev | Mean    | StDev  | T-test(p-Value) |
| mmu-miR-3960    | 7,214   | 3,720 | 5,893   | 1,870  | 0.345729        |
| mmu-miR-7028-5p | 10,850  | 5,504 | 11,422  | 12,795 | 0.707084        |
| mmu-miR-133b-5p | 29,166  | 4,790 | 27,453  | 17,687 | 0.996587        |
| mmu-let-7k      | 347     | 174   | 359     | 360    | 0.770206        |
| mmu-miR-3962    | 317     | 180   | 368     | 322    | 0.465436        |
| mmu-miR-3620-5p | 2,201   | 1,202 | 2,010   | 944    | 0.806528        |
| mmu-miR-669c-5p | 1,567   | 488   | 1,633   | 403    | 0.863513        |
| mmu-miR-2861    | 2,335   | 1,637 | 1,198   | 426    | 0.039967        |
| mmu-miR-669f-5p | 939     | 270   | 934     | 236    | 0.810106        |
| mmu-miR-6238    | 615     | 747   | 2,960   | 4,161  | 0.048597        |
| mmu-miR-341-5p  | 56,348  | 8,592 | 47,700  | 12,934 | 0.012713        |
| mmu-miR-101b-3p | 1,044   | 446   | 1,213   | 426    | 0.326458        |
| mmu-miR-100-5p  | 319     | 96    | 438     | 247    | 0.091844        |
| mmu-miR-143-3p  | 1,202   | 628   | 911     | 121    | 0.131428        |
| mmu-miR-27a-3p  | 1,034   | 309   | 1,105   | 321    | 0.494768        |
| mmu-miR-15a-5p  | 968     | 470   | 1,402   | 576    | 0.036146        |
| mmu-miR-669o-5p | 396     | 150   | 354     | 105    | 0.454633        |
| mmu-miR-195a-5p | 496     | 315   | 490     | 155    | 0.984438        |
| mmu-miR-6937-5p | 4,972   | 2,040 | 4,313   | 1,551  | 0.506479        |
| mmu-miR-669l-5p | 419     | 149   | 380     | 111    | 0.502784        |
| mmu-miR-669n    | 1,609   | 472   | 1,693   | 423    | 0.773574        |
| mmu-miR-466g    | 1,736   | 510   | 1,625   | 366    | 0.559514        |
| mmu-miR-7047-5p | 3,664   | 1,589 | 3,539   | 1,266  | 0.978717        |
| mmu-miR-466c-5p | 599     | 206   | 365     | 139    | 0.006519        |
| mmu-miR-24-3p   | 3,017   | 1,225 | 2,871   | 309    | 0.641511        |
| mmu-miR-194-5p  | 6,894   | 1,425 | 7,668   | 1,980  | 0.318193        |
| mmu-miR-149-3p  | 3,665   | 1,945 | 3,240   | 1,146  | 0.656297        |
| mmu-miR-25-3p   | 512     | 235   | 469     | 85     | 0.506317        |
| mmu-miR-3099-3p | 564     | 144   | 561     | 125    | 0.918921        |
| mmu-let-7j      | 511     | 131   | 557     | 251    | 0.504248        |
| mmu-miR-466j    | 409     | 205   | 574     | 291    | 0.235113        |
| mmu-miR-101c    | 274     | 173   | 303     | 292    | 0.601243        |
| mmu-miR-2137    | 1,320   | 732   | 915     | 382    | 0.127494        |
| mmu-miR-148a-3p | 2,704   | 672   | 3,054   | 912    | 0.241186        |
| mmu-miR-5100    | 1,232   | 940   | 700     | 95     | 0.077305        |
| mmu-miR-762     | 5,644   | 1,968 | 5,078   | 2,189  | 0.629904        |
| mmu-let-7e-5p   | 273     | 151   | 234     | 252    | 0.811858        |
| mmu-miR-30e-5p  | 1,994   | 950   | 2,014   | 604    | 0.860057        |
| mmu-miR-466h-5p | 265     | 185   | 504     | 262    | 0.031873        |
| mmu-miR-3473b   | 875     | 534   | 465     | 216    | 0.037754        |
| mmu-miR-669k-5p | 387     | 154   | 383     | 81     | 0.86831         |
| mmu-miR-466h-3p | 3,202   | 708   | 3,282   | 558    | 0.878888        |
| mmu-miR-3095-3p | 877     | 192   | 826     | 189    | 0.531237        |
| mmu-miR-466i-5p | 3,884   | 832   | 4,156   | 1,033  | 0.674214        |
| mmu-miR-30a-5p  | 3,669   | 1,104 | 3,600   | 731    | 0.907727        |
| mmu-miR-145b    | 893     | 219   | 473     | 288    | 0.001227        |
| mmu-miR-466m-5p | 926     | 269   | 632     | 134    | 0.003522        |

|                 |        |       |        |       |          |
|-----------------|--------|-------|--------|-------|----------|
| mmu-miR-29b-3p  | 894    | 666   | 1,157  | 637   | 0.264488 |
| mmu-miR-151-5p  | 334    | 135   | 334    | 124   | 0.986799 |
| mmu-miR-6970-5p | 512    | 314   | 399    | 154   | 0.35769  |
| mmu-miR-27b-3p  | 1,737  | 431   | 1,888  | 355   | 0.45367  |
| mmu-miR-1934-3p | 399    | 266   | 277    | 154   | 0.244947 |
| mmu-miR-221-3p  | 786    | 251   | 735    | 162   | 0.519058 |
| mmu-miR-3072-5p | 385    | 123   | 455    | 167   | 0.247301 |
| mmu-miR-669c-3p | 2,285  | 623   | 2,092  | 361   | 0.432303 |
| mmu-miR-3077-5p | 392    | 327   | 221    | 104   | 0.125798 |
| mmu-miR-669f-3p | 1,807  | 479   | 1,663  | 241   | 0.420768 |
| mmu-miR-6240    | 502    | 107   | 345    | 128   | 0.00734  |
| mmu-miR-3970    | 68     | 41    | 223    | 257   | 0.034218 |
| mmu-miR-5126    | 8,401  | 3,751 | 6,718  | 1,756 | 0.206182 |
| mmu-miR-7683-3p | 136    | 135   | 318    | 369   | 0.096302 |
| mmu-miR-3535    | 395    | 204   | 254    | 123   | 0.048215 |
| mmu-let-7g-5p   | 3,091  | 535   | 2,883  | 715   | 0.330805 |
| mmu-miR-6239    | 14,009 | 3,189 | 18,268 | 3,055 | 0.00601  |
| mmu-miR-6931-5p | 801    | 377   | 366    | 108   | 0.001608 |
| mmu-miR-378c    | 329    | 127   | 355    | 83    | 0.772099 |
| mmu-miR-6385    | 425    | 140   | 443    | 89    | 0.783923 |
| mmu-miR-485-3p  | 529    | 127   | 572    | 231   | 0.861091 |
| mmu-miR-101a-3p | 1,160  | 558   | 1,346  | 555   | 0.357532 |
| mmu-miR-378a-3p | 446    | 149   | 514    | 129   | 0.396116 |
| mmu-miR-6366    | 277    | 138   | 266    | 75    | 0.865699 |
| mmu-miR-26b-5p  | 2,069  | 582   | 1,718  | 405   | 0.111709 |
| mmu-miR-3473f   | 488    | 363   | 199    | 76    | 0.021179 |
| mmu-let-7f-5p   | 3,119  | 892   | 2,538  | 680   | 0.092733 |
| mmu-miR-7045-5p | 1,231  | 502   | 1,132  | 268   | 0.638869 |
| mmu-miR-23b-3p  | 2,288  | 634   | 2,160  | 503   | 0.508675 |
| mmu-miR-705     | 870    | 350   | 736    | 199   | 0.344456 |
| mmu-miR-3082-5p | 1,533  | 430   | 1,541  | 380   | 0.937836 |
| mmu-miR-1892    | 557    | 337   | 521    | 256   | 0.839428 |
| mmu-miR-3963    | 1,215  | 695   | 1,138  | 366   | 0.861965 |
| mmu-miR-6908-5p | 272    | 110   | 372    | 124   | 0.081446 |
| mmu-miR-22-3p   | 7,143  | 1,381 | 7,467  | 1,743 | 0.688749 |
| mmu-miR-5099    | 2,857  | 903   | 2,234  | 497   | 0.056274 |
| mmu-miR-20b-5p  | 193    | 101   | 289    | 171   | 0.072652 |
| mmu-miR-466q    | 1,750  | 494   | 1,560  | 372   | 0.346314 |
| mmu-miR-7011-5p | 340    | 117   | 435    | 96    | 0.039827 |
| mmu-miR-6965-3p | 689    | 371   | 2,111  | 2,373 | 0.037218 |
| mmu-miR-423-5p  | 319    | 59    | 353    | 188   | 0.492977 |
| mmu-miR-107-3p  | 1,048  | 372   | 1,331  | 287   | 0.08274  |
| mmu-miR-329-3p  | 34     | 20    | 144    | 316   | 0.210463 |
| mmu-miR-7221-3p | 1,527  | 853   | 1,031  | 348   | 0.106025 |
| mmu-miR-30c-5p  | 5,378  | 1,120 | 5,293  | 1,404 | 0.797422 |
| mmu-miR-466f    | 526    | 197   | 537    | 212   | 0.779986 |
| mmu-miR-145a-5p | 1,726  | 554   | 1,417  | 209   | 0.087719 |
| mmu-let-7d-5p   | 2,497  | 735   | 2,091  | 837   | 0.265377 |
| mmu-miR-20a-5p  | 819    | 292   | 805    | 182   | 0.88494  |
| mmu-miR-17-5p   | 558    | 209   | 616    | 187   | 0.481723 |
| mmu-miR-363-5p  | 132    | 84    | 409    | 327   | 0.008187 |
| mmu-miR-21a-5p  | 5,170  | 2,064 | 4,156  | 1,694 | 0.148317 |
| mmu-miR-466f-3p | 3,338  | 638   | 3,353  | 456   | 0.988181 |
| mmu-miR-5130    | 332    | 215   | 120    | 48    | 0.004882 |
| mmu-miR-7082-5p | 2,063  | 640   | 2,862  | 1,106 | 0.0436   |

|                   |        |       |        |       |          |
|-------------------|--------|-------|--------|-------|----------|
| mmu-miR-378b      | 350    | 147   | 371    | 90    | 0.871018 |
| mmu-miR-466i-3p   | 2,524  | 582   | 2,427  | 388   | 0.626978 |
| mmu-miR-30d-5p    | 2,078  | 619   | 1,832  | 851   | 0.539806 |
| mmu-miR-466f-5p   | 483    | 153   | 373    | 129   | 0.024391 |
| mmu-miR-5119      | 277    | 189   | 218    | 118   | 0.451497 |
| mmu-miR-6929-3p   | 326    | 72    | 368    | 110   | 0.387556 |
| mmu-miR-6981-5p   | 941    | 263   | 1,165  | 229   | 0.044817 |
| mmu-miR-130a-3p   | 967    | 286   | 1,011  | 223   | 0.777342 |
| mmu-miR-93-5p     | 434    | 182   | 458    | 65    | 0.70582  |
| mmu-let-7i-5p     | 845    | 236   | 864    | 270   | 0.89157  |
| mmu-miR-7658-5p   | 248    | 191   | 118    | 40    | 0.039922 |
| mmu-miR-1187      | 1,765  | 391   | 2,275  | 725   | 0.084365 |
| mmu-miR-5107-5p   | 429    | 174   | 648    | 210   | 0.008225 |
| mmu-miR-346-3p    | 626    | 302   | 468    | 183   | 0.21009  |
| mmu-miR-122-3p    | 2,205  | 817   | 2,301  | 1,003 | 0.780025 |
| mmu-miR-669e-5p   | 154    | 124   | 287    | 151   | 0.055    |
| mmu-miR-342-3p    | 160    | 82    | 231    | 153   | 0.139103 |
| mmu-miR-29c-3p    | 2,844  | 1,239 | 3,114  | 1,290 | 0.501129 |
| mmu-miR-3473e     | 702    | 435   | 333    | 144   | 0.019497 |
| mmu-miR-152-3p    | 537    | 190   | 553    | 191   | 0.830174 |
| mmu-miR-5113      | 512    | 135   | 468    | 134   | 0.473942 |
| mmu-miR-22-5p     | 479    | 165   | 506    | 138   | 0.764314 |
| mmu-miR-214-3p    | 546    | 374   | 536    | 92    | 0.948595 |
| mmu-miR-103-3p    | 1,064  | 398   | 1,298  | 295   | 0.180138 |
| mmu-let-7a-5p     | 2,818  | 843   | 2,284  | 920   | 0.193003 |
| mmu-miR-802-5p    | 412    | 256   | 386    | 250   | 0.935593 |
| mmu-miR-6944-5p   | 660    | 359   | 512    | 201   | 0.328479 |
| mmu-miR-181a-5p   | 419    | 533   | 207    | 24    | 0.200903 |
| mmu-miR-6896-3p   | 621    | 147   | 679    | 183   | 0.487437 |
| mmu-miR-8101      | 315    | 160   | 306    | 109   | 0.956405 |
| mmu-miR-494-3p    | 306    | 108   | 607    | 455   | 0.020016 |
| mmu-miR-690       | 12,388 | 2,556 | 12,478 | 1,637 | 0.865777 |
| mmu-miR-466m-3p   | 1,589  | 411   | 1,530  | 227   | 0.683266 |
| mmu-miR-146a-5p   | 571    | 222   | 642    | 231   | 0.454848 |
| mmu-miR-6922-5p   | 492    | 201   | 502    | 116   | 0.907653 |
| mmu-miR-669a-3p   | 1,975  | 540   | 1,877  | 276   | 0.645677 |
| mmu-miR-1895      | 875    | 202   | 1,151  | 258   | 0.012891 |
| mmu-miR-30b-5p    | 3,305  | 908   | 3,238  | 856   | 0.850504 |
| mmu-miR-672-5p    | 245    | 137   | 441    | 238   | 0.041637 |
| mmu-miR-92b-3p    | 420    | 175   | 315    | 64    | 0.086432 |
| mmu-miR-203-3p    | 453    | 118   | 519    | 178   | 0.39029  |
| mmu-miR-8093      | 54     | 60    | 138    | 285   | 0.287563 |
| mmu-miR-3097-5p   | 377    | 157   | 397    | 231   | 0.854942 |
| mmu-miR-99a-5p    | 863    | 298   | 887    | 402   | 0.779772 |
| mmu-miR-31-5p     | 749    | 226   | 759    | 158   | 0.958095 |
| mmu-miR-669e-3p   | 1,689  | 440   | 1,579  | 195   | 0.529697 |
| mmu-miR-122-5p    | 10,790 | 972   | 11,909 | 2,243 | 0.237239 |
| mmu-miR-1224-5p   | 419    | 135   | 432    | 91    | 0.707676 |
| mmu-miR-23a-3p    | 2,104  | 569   | 1,890  | 487   | 0.323776 |
| mmu-miR-5112      | 4,114  | 2,707 | 6,888  | 5,212 | 0.071404 |
| mmu-miR-7661-3p   | 280    | 96    | 388    | 91    | 0.018606 |
| mmu-let-7c-5p     | 2,337  | 706   | 1,949  | 839   | 0.276307 |
| mmu-miR-451a      | 4,801  | 844   | 4,358  | 1,396 | 0.431628 |
| mmu-miR-32-3p     | 785    | 266   | 719    | 202   | 0.528477 |
| mmu-miR-669a-3-3p | 739    | 278   | 579    | 153   | 0.131556 |

|                  |        |       |        |        |          |
|------------------|--------|-------|--------|--------|----------|
| mmu-miR-7239-3p  | 3,747  | 4,414 | 8,162  | 10,140 | 0.133449 |
| mmu-miR-15b-5p   | 412    | 152   | 321    | 82     | 0.092767 |
| mmu-miR-7027-3p  | 283    | 53    | 296    | 106    | 0.764451 |
| mmu-miR-19b-3p   | 492    | 262   | 562    | 197    | 0.594425 |
| mmu-miR-26a-5p   | 5,655  | 751   | 5,397  | 1,012  | 0.302324 |
| mmu-miR-7081-5p  | 3,523  | 2,029 | 5,329  | 5,554  | 0.203969 |
| mmu-miR-125a-5p  | 840    | 158   | 446    | 194    | 4.533E-5 |
| mmu-miR-467a-3p  | 1,210  | 378   | 1,079  | 286    | 0.412676 |
| mmu-miR-5121     | 518    | 205   | 392    | 82     | 0.044916 |
| mmu-miR-7235-3p  | 594    | 93    | 649    | 180    | 0.463036 |
| mmu-miR-467f     | 2,627  | 602   | 2,567  | 465    | 0.768961 |
| mmu-miR-714      | 413    | 245   | 250    | 80     | 0.062626 |
| mmu-let-7b-5p    | 1,444  | 466   | 1,290  | 624    | 0.585893 |
| mmu-miR-467e-3p  | 740    | 248   | 593    | 164    | 0.143019 |
| mmu-miR-467c-3p  | 880    | 293   | 736    | 194    | 0.220199 |
| mmu-miR-574-5p   | 2,597  | 552   | 3,040  | 938    | 0.295107 |
| mmu-miR-483-5p   | 1,085  | 329   | 1,260  | 261    | 0.182766 |
| mmu-miR-212-3p   | 32     | 12    | 259    | 171    | 0.000167 |
| mmu-miR-6348     | 1,258  | 426   | 1,403  | 400    | 0.542885 |
| mmu-miR-467g     | 701    | 242   | 512    | 172    | 0.053295 |
| mmu-miR-574-3p   | 1,659  | 415   | 1,475  | 342    | 0.311189 |
| mmu-miR-126a-3p  | 4,832  | 1,128 | 4,781  | 914    | 0.920253 |
| mmu-miR-7016-5p  | 269    | 63    | 363    | 209    | 0.112953 |
| mmu-miR-467b-3p  | 2,685  | 618   | 2,764  | 444    | 0.805065 |
| mmu-miR-199a-5p  | 342    | 295   | 301    | 45     | 0.670773 |
| mmu-miR-468-3p   | 428    | 145   | 357    | 159    | 0.113217 |
| mmu-miR-3569-5p  | 262    | 75    | 337    | 93     | 0.029548 |
| mmu-miR-467d-3p  | 2,044  | 547   | 2,004  | 398    | 0.865427 |
| mmu-miR-192-5p   | 6,114  | 1,229 | 6,908  | 1,594  | 0.294265 |
| mmu-miR-7116-5p  | 285    | 368   | 396    | 290    | 0.335222 |
| mmu-miR-199a-3p  | 605    | 491   | 625    | 168    | 0.888147 |
| mmu-miR-700-3p   | 259    | 86    | 329    | 184    | 0.192203 |
| mmu-miR-191-5p   | 1,121  | 397   | 1,162  | 270    | 0.812239 |
| mmu-miR-200b-3p  | 181    | 161   | 113    | 45     | 0.156052 |
| mmu-miR-1191b-5p | 106    | 131   | 129    | 275    | 0.705775 |
| mmu-miR-328-5p   | 274    | 91    | 319    | 119    | 0.214503 |
| mmu-miR-455-3p   | 371    | 108   | 231    | 71     | 0.00106  |
| mmu-miR-200a-3p  | 222    | 205   | 145    | 55     | 0.210269 |
| mmu-miR-16-5p    | 4,536  | 997   | 5,326  | 875    | 0.069498 |
| mmu-miR-709      | 13,326 | 2,032 | 16,085 | 2,474  | 0.012694 |
| mmu-miR-8090     | 53     | 75    | 138    | 334    | 0.35321  |
| mmu-miR-92a-3p   | 800    | 306   | 670    | 132    | 0.170368 |
| mmu-miR-7056-5p  | 347    | 99    | 484    | 112    | 0.002219 |
| mmu-miR-139-5p   | 261    | 90    | 166    | 43     | 0.004586 |
| mmu-miR-466d-3p  | 260    | 111   | 153    | 39     | 0.008479 |
| mmu-miR-6970-3p  | 47     | 15    | 2,013  | 1,567  | 0.000219 |
| mmu-miR-132-3p   | 73     | 38    | 345    | 371    | 0.014901 |

**Supplementary Table S2. Conserved putative binding sites for mmu-miR-125a-5.**

| Gene            | mmu-miR-125a-5p:3'UTR base-pairing                                                                                                              | Position on 3'UTR |             |
|-----------------|-------------------------------------------------------------------------------------------------------------------------------------------------|-------------------|-------------|
|                 |                                                                                                                                                 | Start             | End         |
| <b>Stat3</b>    | target 5' C UG CCUGCCUCAGACUAC CCCUCAGCAAAG G 3'<br>UACAGGUU AA AGG CUCAGGGA<br>                 <br>AGUGUCAA UU UCC GAGUCCCU<br>miRNA 3' CA 5' | <b>969</b>        | <b>1020</b> |
| <b>Caspase2</b> | target 5' UUCUGUCUACCCUCCUCUCAGGGA 3'<br>     <br>miR 3' .AGUGUCAAUUUCCCAGAGUCCCU 5'                                                            | <b>76</b>         | <b>100</b>  |
| <b>Stard13</b>  | target 5' ...CAGCAUGACAUCAAACUCAGGGA 3'<br>     <br>miR 3' AGUGUCAAUUUCCCAGAGUCCCU 5'                                                           | <b>9</b>          | <b>31</b>   |
| <b>Triap1</b>   | target 5' C GCUCG UC ACCUCUUUUUCC U 3'<br>UCAUGGG G GGG UCUCAGGGA<br>                 <br>AGUGUCC U CCC AGAGUCCCU<br>miRNA 3' AA UU 5'          | <b>328</b>        | <b>367</b>  |
| <b>Nup210</b>   | target 5' G U U A A 3'<br>UCAC GU AG G UCUCAGGGA<br>             <br>AGUG CA UC C AGAGUCCCU<br>miRNA 3' UC AUU C 5'                             | <b>349</b>        | <b>371</b>  |
| <b>Vps4b</b>    | target 5' U A UCUUUAC U 3'<br>GGU GAA UCUCAGGGA<br>         <br>CCA UUU AGAGUCCCU<br>miRNA 3' AGUGU A CCC 5'                                    | <b>434</b>        | <b>458</b>  |

**Supplementary Table S3. The sequence conservation of miR125a-5p between mouse and human.**

| Specie | MiR-125a-5p sequence          |
|--------|-------------------------------|
| Mouse  | 5'UCCCUGAGACCCUUUAACCUGUGA 3' |
| Human  | 5'UCCCUGAGACCCUUUAACCUGUGA 3' |
